# Supplementary material
Source: publisher figshare collection journal article supplement (https://asha.figshare.com/articles/dataset/_/12475796)
Supplement: Supplementary file 1 [file 1]

**Supplemental Material S1.**

Summary of review studies.

| Serial number | Authors            | Study title                                                                                                                                                    | Study year | Country or countries | Number of participants                | Type of Testing                                                           | Teleaudiology approach       | RQ1: Who served as patient-site facilitator?                                            | RQ2: What were the facilitator's duties?                                                                                                                                                                                                   | RQ3: What was the facilitator's training? |                      |                                                                                                                                                         |
|---------------|--------------------|----------------------------------------------------------------------------------------------------------------------------------------------------------------|------------|----------------------|---------------------------------------|---------------------------------------------------------------------------|------------------------------|-----------------------------------------------------------------------------------------|--------------------------------------------------------------------------------------------------------------------------------------------------------------------------------------------------------------------------------------------|-------------------------------------------|----------------------|---------------------------------------------------------------------------------------------------------------------------------------------------------|
|               |                    |                                                                                                                                                                |            |                      |                                       |                                                                           |                              |                                                                                         |                                                                                                                                                                                                                                            | Who trained the facilitator?              | Duration of training | Content of training                                                                                                                                     |
| 1             | Crump & Driscoll   | An application of telemedicine technology for otorhinolaryngology diagnosis.                                                                                   | 1996       | USA                  | 8                                     | video otoscopy                                                            | synchronous                  | nurse technician                                                                        | Prepare patient for testing, answer questions from the individual at the remote site, operate equipment.                                                                                                                                   | Licensed vocational nurse                 | Several hours        | Set up and use teleaudiology equipment, prepare for patient, sterilization procedures.                                                                  |
| 2             | Stern et al.       | Telemedicine applications in otolaryngology.                                                                                                                   | 1998       | USA                  | 45                                    | video otoscopy                                                            | asynchronous                 | otolaryngology chief resident                                                           | Interview patients, capture videos and still images using video otoscope and transmit images to remote site.                                                                                                                               | No details                                | No details           | No details                                                                                                                                              |
| 3             | Sclafani et al.    | Teleconsultation in otolaryngology: Live versus store and forward consultations.                                                                               | 1999       | USA                  | 45                                    | video otoscopy                                                            | asynchronous and synchronous | otolaryngology chief resident                                                           | Interview patients, capture videos and still images using video otoscope and transmit images to remote site.                                                                                                                               | No details                                | No details           | No details                                                                                                                                              |
| 4             | Patricoski et al.  | A comparison of in-person examination and video otoscope imaging for tympanostomy tube follow-up.                                                              | 2003       | USA                  | 40                                    | video otoscopy                                                            | asynchronous                 | community health aide, nurse, or nurse practitioner                                     | Capture video otoscopic images, discard poor images and repeat the procedure to obtain new video otoscopic images when necessary, and store on server, hold child during video otoscopy if necessary.                                      | No details                                | Several hours        | Hand positioning of the otoscope, focusing, cleaning the tip of the specula, setting white balance, using image enhancement, lighting, and maneuvering. |
| 5             | Givens et al.      | Internet-based tele-audiometry system for the assessment of hearing: A pilot study.                                                                            | 2003       | USA                  | 31                                    | pure tone audiometry                                                      | synchronous                  | audiologist                                                                             | Perform hearing assessments.                                                                                                                                                                                                               | No details                                | No details           | No details                                                                                                                                              |
| 6             | Givens & Elangovan | Internet application to tele-audiology – 'Nothing' but net.                                                                                                    | 2003       | USA                  | 45 air conduction, 25 bone conduction | pure tone audiometry                                                      | synchronous                  | audiologist                                                                             | Perform hearing assessments.                                                                                                                                                                                                               | No details                                | No details           | No details                                                                                                                                              |
| 7             | Towers et al.      | The reliability of click-evoked and frequency-specific auditory brainstem response testing using telehealth technology.                                        | 2005       | USA                  | 15                                    | Auditory Brainstem Response testing for individuals with normal hearing   | synchronous                  | second-year audiology graduate student                                                  | Prepare client's skin for electrodes, place electrodes and transducers on clients.                                                                                                                                                         | No details                                | No details           | No details                                                                                                                                              |
| 8             | Ribera             | Interjudge reliability and validation of telehealth applications of the Hearing in Noise Test (HINT).                                                          | 2005       | USA                  | 20                                    | speech-in-noise testing for individuals with normal hearing               | synchronous                  | audiology faculty and audiology graduate students experienced in administering the HINT | Administer the Hearing In Noise Test, communicate with examiner at distant site, judge subject's response.                                                                                                                                 | No details                                | No details           | No details                                                                                                                                              |
| 9             | Smith et al.       | Realtime telemedicine for paediatric otolaryngology pre-admission screening.                                                                                   | 2005       | Australia            | 64                                    | video otoscopy                                                            | synchronous                  | pediatrician                                                                            | Conduct videoconference, capture videos and still images using video otoscope, transmit images to remote site.                                                                                                                             | No details                                | No details           | No details                                                                                                                                              |
| 10            | Elangovan S.       | Telehearing and the internet.                                                                                                                                  | 2005       | USA                  | 45 audiometry, 5 OAEs                 | pure tone audiometry and Otoacoustic Emissions                            | synchronous                  | audiologist                                                                             | Perform hearing assessments and OAE measurements, place transducers on participants, instruct clients on testing procedures, assess candidacy criteria, build rapport with client, collect case history, coordinate with remote clinician. | No details                                | No details           | No details                                                                                                                                              |
| 11            | Smith et al.       | Accuracy of pre-recorded video images for the assessment of rural indigenous children with ear, nose and throat conditions.                                    | 2006       | Australia            | 58                                    | video otoscopy                                                            | asynchronous                 | research nurse                                                                          | Collect case history, conduct video otoscopy recordings.                                                                                                                                                                                   | No details                                | No details           | No details                                                                                                                                              |
| 12            | Krumm et al.       | Providing basic hearing tests using remote computing technology.                                                                                               | 2007       | USA                  | 30                                    | pure tone audiometry and Otoacoustic Emissions                            | synchronous                  | audiologist                                                                             | Place transducers on client, instruct client on testing procedure, conduct audiometric screening, conduct otoscopy.                                                                                                                        | No details                                | No details           | No details                                                                                                                                              |
| 13            | Shapiro et al.     | Remote intraoperative monitoring during cochlear implant surgery is feasible and efficient.                                                                    | 2008       | USA                  | 4                                     | intraoperative monitoring                                                 | synchronous                  | neurotology fellow, cochlear implant surgeon, circulating nurse                         | Connect laptop to intranet, connect laptop to programming interface, place cable with coil into a sterile bag, read patient information to audiologist, provide IP address to off-site audiologist.                                        | No details                                | No details           | No details                                                                                                                                              |
| 14            | Lundberg et al.    | Digital imaging and telemedicine as a tool for studying inflammatory conditions in the middle ear-evaluation of image quality and agreement between examiners. | 2008       | Sweeden              | 64                                    | video otoscopy                                                            | asynchronous                 | nurse                                                                                   | Collect case history, take images of tympanic membrane, collect tympanogram, store data on PC, videoconference with study personnel.                                                                                                       | No details                                | No details           | No details                                                                                                                                              |
| 15            | Lancaster et al.   | Remote hearing screenings via telehealth in a rural elementary school.                                                                                         | 2008       | USA                  | 32                                    | video otoscopy, pure tone audiometry screening, and immittance screening  | synchronous and asynchronous | trained assistant                                                                       | Conduct video otoscopy, place headphones on client.                                                                                                                                                                                        | No details                                | No details           | No details                                                                                                                                              |
| 16            | Krumm et al.       | Telemedicine for audiology screening of infants.                                                                                                               | 2008       | USA                  | 30                                    | Otoacoustic Emissions and automated Auditory Brainstem Response screening | synchronous                  | audiologist                                                                             | Instruct parents on testing procedure, insert DPOAE probe, apply electrodes, place transducers on client.                                                                                                                                  | No details                                | No details           | No details                                                                                                                                              |
| 17            | Kokesh et al.      | Digital images for postsurgical followup of tympanostomy tubes in remote Alaska.                                                                               | 2008       | USA                  | 35                                    | video otoscopy                                                            | asynchronous                 | Community Health Aide/Practitioners (CHA/P)                                             | Collect case history, examine subjects' ears, obtain video otoscopy images.                                                                                                                                                                | No details                                | No details           | How to conduct video otoscopy and on the telehealth software, and how to capture quality images.                                                        |

|    |                           |                                                                                                                                            |      |                                |                                                                  |                                                                                                           |              |                                                                                                       |                                                                                                                                                                                                                                       |                       |            |                                                                      |
|----|---------------------------|--------------------------------------------------------------------------------------------------------------------------------------------|------|--------------------------------|------------------------------------------------------------------|-----------------------------------------------------------------------------------------------------------|--------------|-------------------------------------------------------------------------------------------------------|---------------------------------------------------------------------------------------------------------------------------------------------------------------------------------------------------------------------------------------|-----------------------|------------|----------------------------------------------------------------------|
| 18 | Smith et al.              | Concordance between real-time telemedicine assessments and face-to-face consultations in paediatric otolaryngology.                        | 2008 | Australia                      | 97                                                               | video otoscopy                                                                                            | asynchronous | pediatrician                                                                                          | Perform video otoscopy.                                                                                                                                                                                                               | No details            | No details | No details                                                           |
| 19 | Ramos et al.              | Use of telemedicine in the remote programming of cochlear implants.                                                                        | 2009 | Spain                          | 5                                                                | cochlear implant programming                                                                              | synchronous  | local representative                                                                                  | Manage local hardware, serve as communication link between two sites, produce sounds for testing, perform safety stimulation stops, complete questionnaire to evaluate session.                                                       | No details            | No details | No details                                                           |
| 20 | Pearce et al.             | A pilot investigation into the provision of hearing services using tele-audiology to remote areas.                                         | 2009 | Australia                      | 5                                                                | video otoscopy, pure tone audiometry, hearing aid fitting and verification, and rehabilitative counseling | synchronous  | hearing assistant                                                                                     | Connect audiometer to laptop, place headphones on client under supervision of remote audiologist, connect hearing device to computer, place probe microphone in client's ear.                                                         | No details            | No details | How to assist fitting headsets and real-ear measurement probes.      |
| 21 | Ferrari & Bernandez-Braga | Remote probe microphone measurement to verify hearing aid performance.                                                                     | 2009 | Brazil                         | 60                                                               | probe microphone measures                                                                                 | synchronous  | audiologist not familiar with probe measures                                                          | Facilitate automated hearing screening protocol, upload results to server.                                                                                                                                                            | No details            | No details | No details                                                           |
| 22 | Kokesh et al.             | Traveling an audiologist to provide otolaryngology care using store-and-forward telemedicine.                                              | 2009 | USA                            | 1,458                                                            | video otoscopy, audiometry, tympanometry, reflexes, Otoacoustic Emissions                                 | asynchronous | audiologist                                                                                           | Collect case history, conduct video otoscopy, collect audiogram, tympanometry, acoustic reflexes, and OAEs.                                                                                                                           | No details            | No details | Use of software, video otoscopy, digital cameras, document scanners. |
| 23 | Swanepoel et al.          | Intercontinental hearing assessment - A study in tele-audiology.                                                                           | 2010 | USA and South Africa           | 30                                                               | pure-tone audiometry for normal hearing subjects                                                          | synchronous  | physician                                                                                             | Position transducers on client, communicate with remote audiologist, assist in conducting audiometric assessment.                                                                                                                     | No details            | No details | No details                                                           |
| 24 | Wasowski et al.           | Remote fitting of cochlear implant system.                                                                                                 | 2010 | Poland                         | 30                                                               | cochlear implant programming                                                                              | synchronous  | speech therapist                                                                                      | Help client communicate with remote specialist, perform safety stimulation stops.                                                                                                                                                     | No details            | No details | No details                                                           |
| 25 | Wesarg et al.             | Remote fitting in Nucleus cochlear implant recipients.                                                                                     | 2010 | Germany, Spain, Poland, Greece | 70                                                               | cochlear implant programming                                                                              | synchronous  | technician, audiologist, teacher of the deaf, speech therapist, psychologist                          | Set up fitting equipment, observe and comfort the client, assist with communication between client and remote audiologist, perform safety stimulation stops, connect and disconnect the speech processor from the clinical interface. | No details            | No details | No details                                                           |
| 26 | Elliot et al.             | The feasibility of a community-based mobile telehealth screening service for Aboriginal and Torres Strait Islander children in Australia.  | 2010 | Australia                      | 442                                                              | video otoscopy, tympanometry and pure-tone audiometry                                                     | asynchronous | aboriginal health worker with advanced hearing-health training and extensive experience in ear health | Obtain video otoscopy images, obtain tympanometry and audiometric data for off-line analysis by audiologist.                                                                                                                          | No details            | No details | No details                                                           |
| 27 | Crowell et al.            | Audiology telepractice in a clinical environment: A communication perspective.                                                             | 2011 | USA                            | 12                                                               | pure tone audiometry                                                                                      | synchronous  | audiology graduate student                                                                            | Power on audiometer, obtain client consent, set up equipment, instruct client on testing procedure, client management, collect results from conventional audiological assessment.                                                     | No details            | No details | No details                                                           |
| 28 | Ciccia et al.             | Improving the access of young urban children to speech language and hearing screening via telehealth.                                      | 2011 | USA                            | 358 hearing screening, 377 tympanometry, 263 speech and language | tympanometry, Otoacoustic Emissions screening, pure tone audiometry, speech and language screening        | synchronous  | student in speech-language pathology or audiology                                                     | Conduct DPOAE screening, conduct immittance testing under supervision, relay results of tests to audiologist for real time interpretation, conduct audiometric screening under remote supervision.                                    | Supervising clinician | No details | Protocol for recruitment and screening.                              |
| 29 | Wasowski et al.           | The telefitting method used in the national network of teleaudiology: Assessment of quality and cost effectiveness.                        | 2012 | Poland and Ukraine             | 94                                                               | cochlear implant programming                                                                              | synchronous  | support specialist                                                                                    | Help client communicate with remote specialist, connect speech processor to computer interface, conduct structured interview with client regarding communication skills and hearing benefits.                                         | No details            | No details | No details                                                           |
| 30 | Smith et al.*             | A mobile telemedicine-enabled ear screening service for indigenous children in Queensland: Activity and outcomes in the first three years. | 2012 | Australia                      | 1053                                                             | video otoscopy, tympanometry, pure-tone air conduction screening                                          | asynchronous | local indigenous health worker                                                                        | Collect client case history, conduct video otoscopy, conduct hearing screening, conduct tympanometry screening, administer health risk questionnaire.                                                                                 | No details            | No details | No details                                                           |
| 31 | Penteado et al.           | Remote hearing aid fitting: Tele-audiology in the context of Brazilian public policy.                                                      | 2012 | Brazil                         | 3                                                                | hearing aid fitting services                                                                              | synchronous  | audiologist                                                                                           | Enter patient data to computer, communicate with remote audiologist, conduct hearing aid fitting under supervision of remote audiologist                                                                                              | Remote audiologist    | 30 minutes | Electro-acoustic hearing aid features.                               |
| 32 | Hughes et al.             | Use of telehealth for research and clinical measures in cochlear implant recipients: A validation study.                                   | 2012 | USA                            | 29                                                               | cochlear implant programming                                                                              | synchronous  | graduate students in audiology or students with a background in nursing                               | Set up testing equipment, initiate videoconferencing connection, assist with calibration of speech materials, greet client, monitor videoconferencing connection.                                                                     | No details            | No details | No details                                                           |

|    |                       |                                                                                                                                                                      |      |                       |      |                                                                                                                      |              |                                                                                     |                                                                                                                                                                                                                                                              |             |            |                                                                                                                                                                                                                                                                                                                  |
|----|-----------------------|----------------------------------------------------------------------------------------------------------------------------------------------------------------------|------|-----------------------|------|----------------------------------------------------------------------------------------------------------------------|--------------|-------------------------------------------------------------------------------------|--------------------------------------------------------------------------------------------------------------------------------------------------------------------------------------------------------------------------------------------------------------|-------------|------------|------------------------------------------------------------------------------------------------------------------------------------------------------------------------------------------------------------------------------------------------------------------------------------------------------------------|
| 33 | Hayes et al.          | From Colorado to Guam: Infant diagnostic audiological evaluations by telepractice.                                                                                   | 2012 | USA and Guam          | 9    | tympanometry, Auditory Brainstem Response testing, Otoacoustic Emissions, and Auditory Steady-State Response testing | synchronous  | Guam audiometrists                                                                  | Support family, facilitate testing, and meet the staff associated with the program, including the providers who refer the infants, and the audiologist who provides follow-up care to the infants.                                                           | Audiologist | No details | Infant otoscopy, tympanometry, electrode application and removal, coupling, probe placement, earphone, and bone conductor placement, infection control, infant calming, and family support.                                                                                                                      |
| 34 | Campos & Ferrari      | Teleaudiology: Evaluation of teleconsultation efficacy for hearing aid fitting.                                                                                      | 2012 | Brazil                | 50   | hearing aid fitting services                                                                                         | synchronous  | undergraduate speech-language student without experience in hearing aid fitting     | Conduct video otoscopy, connect hearing aids to programming cables and HI-Pro interface, insert and remove hearing aid and ear mold, position probe tube for calibration, position client in test environment, insert and remove probe tube in client's ear. | No details  | No details | Otologic inspection, connect hearing aids to the equipment, hearing aid and earmold insertion/removal, position Real Ear probe tube for calibration, position the participant, insertion and removal of the probe tube in the participant's ear, how to interact with the remote provider via videoconferencing. |
| 35 | Ramkumar et al.*      | Tele-ABR using a satellite connection in a mobile van for newborn hearing testing.                                                                                   | 2013 | India                 | 24   | Auditory Brainstem Response testing                                                                                  | synchronous  | village health worker                                                               | Prepare infant's skin, place ABR electrodes on client, insert earphones into infant's ears.                                                                                                                                                                  | No details  | No details | No details                                                                                                                                                                                                                                                                                                       |
| 36 | Biagio et al.         | Asynchronous video-otoscopy with a telehealth facilitator.                                                                                                           | 2013 | Australia             | 61   | video otoscopy                                                                                                       | asynchronous | facilitator with no formal health care training                                     | Collect case history, acquire video otoscopic images.                                                                                                                                                                                                        | No details  | Two days   | Hand positioning, manipulating speculum, focusing, taking video images, using software, sterilization.                                                                                                                                                                                                           |
| 37 | Swanepoel et al.*     | Smartphone hearing screening with integrated quality control and data management.                                                                                    | 2014 | South Africa          | 162  | pure tone audiometry screening                                                                                       | synchronous  | audiology student                                                                   | Instruct clients on testing procedure, conduct audiometric screening.                                                                                                                                                                                        | Audiologist | No details | How to conduct conventional audiometry and audiometry using the HearScreen audiometer.                                                                                                                                                                                                                           |
| 38 | Reginato & Ferrari    | Teleaudiology: Professional-patient communication in hearing aid programming and fitting via teleconsultation.                                                       | 2014 | Brazil                | 40   | hearing aid programming and verification                                                                             | synchronous  | Speech-Language Pathologist without experience in hearing aid selection and fitting | Connect hearing aids to programming cables, insert and remove hearing aids, insert and remove probe tubes, calibrate probe tubes, position participant, communicate with remote audiologist.                                                                 | No details  | No details | The use of software (Skype and TeamViewer), hearing aid connection to programming cables, insertion and removal of hearing aid and/or probe tubes, probe tube calibration, participant positioning.                                                                                                              |
| 39 | Penteado et al.       | Use of the Satisfaction with Amplification in Daily Life (SADL) questionnaire to assess patient satisfaction following remote hearing aid adjustments (telefitting). | 2014 | Brazil                | 8    | hearing aid fitting services                                                                                         | synchronous  | audiologist                                                                         | Remove and insert client's hearing aids, check client's ear molds for wax, connect hearing aids to programming cables, administer questionnaire.                                                                                                             | Audiologist | No details | No details                                                                                                                                                                                                                                                                                                       |
| 40 | Lundberg et al.*      | Remote evaluation of video-otoscopy recordings in an unselected pediatric population with an otitis media scale.                                                     | 2014 | South Africa          | 90   | video otoscopy                                                                                                       | asynchronous | individual with no formal health care training                                      | Conduct video otoscopy recordings, upload recordings to server.                                                                                                                                                                                              | Otologist   | Two days   | How to conduct video otoscopy.                                                                                                                                                                                                                                                                                   |
| 41 | Kuzovkov et al.       | Remote programming of Med-El cochlear implants: Users' and professionals' evaluation of the remote programming experience.                                           | 2014 | Italy, Sweden, Russia | 26   | cochlear implant services                                                                                            | synchronous  | local health care professional                                                      | Set up remote connection.                                                                                                                                                                                                                                    | No details  | No details | No details                                                                                                                                                                                                                                                                                                       |
| 42 | Eikelboom et al.      | Validation of remote mapping of cochlear implants.                                                                                                                   | 2014 | Australia             | 11   | cochlear implant mapping                                                                                             | synchronous  | research assistant or family member                                                 | Under supervision of audiologist, administer subjective outcomes tests, instruct clients on testing procedure, repeat instructions in case client did not understand, administer Ling Six sound test.                                                        | No details  | No details | No details                                                                                                                                                                                                                                                                                                       |
| 43 | Biagio et al.         | Video-otoscopy recordings for diagnosis of childhood ear disease using telehealth at primary health care level.                                                      | 2014 | Australia             | 140  | video otoscopy                                                                                                       | asynchronous | facilitator with no formal health care training                                     | Collect case history, acquire video otoscopic images.                                                                                                                                                                                                        | Otologist   | Two days   | Patient positioning, visual inspection of the external ear, hand positioning, manipulation of speculum, focus adjustment, recording capture, video-otoscope software use, and equipment cleansing.                                                                                                               |
| 44 | Visagie et al.        | Accuracy of remote hearing assessment in a rural community.                                                                                                          | 2015 | South Africa          | 20   | pure tone audiometry                                                                                                 | synchronous  | local community member                                                              | No details.                                                                                                                                                                                                                                                  | Audiologist | No details | Earphone insertion, headset positioning, and use of response button.                                                                                                                                                                                                                                             |
| 45 | Smith et al.*         | Monitoring ear health through a telemedicine-supported health screening service in Queensland.                                                                       | 2015 | Australia             | 5539 | video otoscopy, tympanometry, pure tone audiometry screening                                                         | asynchronous | local indigenous health worker                                                      | Collect case history, conduct video otoscopy, conduct hearing screening.                                                                                                                                                                                     | No details  | No details | No details                                                                                                                                                                                                                                                                                                       |
| 46 | Botasso et al.        | Teleaudiometry as a screening method in school children.                                                                                                             | 2015 | Brazil                | 243  | video otoscopy, pure tone audiometry screening                                                                       | asynchronous | audiologist                                                                         | Conduct: video otoscopy, immittance testing, and audiometric screening.                                                                                                                                                                                      | No details  | No details | No details                                                                                                                                                                                                                                                                                                       |
| 47 | Yousuf Hussein et al. | Smartphone hearing screening in mHealth assisted community-based primary care.                                                                                       | 2016 | South Africa          | 703  | pure tone audiometry screening                                                                                       | asynchronous | community health worker                                                             | Instruct clients on testing procedure, conduct audiometric screening using automated protocol, refer clients to primary health care clinic for diagnostic testing when necessary.                                                                            | No details  | Four hours | Ear and hearing health care and its importance, hands-on practice with the hearing screening smartphone application.                                                                                                                                                                                             |

|    |                        |                                                                                                                                                             |      |              |        |                                                                                                |              |                                                                                       |                                                                                                                                                                                                                                                                                                                                                                                           |                     |                       |                                                                                                                                                                                                                                                   |
|----|------------------------|-------------------------------------------------------------------------------------------------------------------------------------------------------------|------|--------------|--------|------------------------------------------------------------------------------------------------|--------------|---------------------------------------------------------------------------------------|-------------------------------------------------------------------------------------------------------------------------------------------------------------------------------------------------------------------------------------------------------------------------------------------------------------------------------------------------------------------------------------------|---------------------|-----------------------|---------------------------------------------------------------------------------------------------------------------------------------------------------------------------------------------------------------------------------------------------|
| 48 | Sandstrom et al.       | Smartphone threshold audiometry in underserved primary health-care contexts.                                                                                | 2016 | South Africa | 94     | pure tone audiometry screening                                                                 | synchronous  | undergraduate audiology student                                                       | Collect client demographic information, place transducers on client, provide instructions to client on screening protocol, conduct audiometric screening, refer clients to hospital for hearing aid fitting evaluation.                                                                                                                                                                   | No details          | Two hours             | How to conduct smartphone hearing screening and how to facilitate automated pure-tone air and bone conduction audiometry.                                                                                                                         |
| 49 | Pross et al.           | Teleaudiology in the Veterans Health Administration.                                                                                                        | 2016 | USA          | 42,697 | video otoscopy, Otoacoustic Emissions, hearing screening, speech testing, hearing aid services | synchronous  | audiology technician                                                                  | Place headphones on client, assist with: video otoscopy, air conduction and bone conduction audiometry, otoacoustic emissions testing, immittance, and speech testing.                                                                                                                                                                                                                    | No details          | No details            | No details                                                                                                                                                                                                                                        |
| 50 | Novak et al.           | The future of healthcare delivery: IPE/IPP audiology and nursing student/faculty collaboration to deliver hearing aids to vulnerable adults via telehealth. | 2016 | USA          | 181    | hearing aid services                                                                           | synchronous  | graduate student in nursing                                                           | Help collect client case history, help determine hearing needs of client, conduct video otoscopy, measure pinna to prepare for hearing aid tube, help client select hearing aid color, conduct listening check of hearing aids, help orient client on the care and maintenance of hearing aid, conduct manual aspects of real-ear probe mic measurements, accompany clients to check-out. | Supervising faculty | One academic semester | Delivery of hearing health care services and hearing aids to vulnerable hard of hearing patients, how to interpret hearing tests and immittance results, otoscopy, ear anatomy and physiology, tympanometry, and specific hearing aid technology. |
| 51 | Dharmar et al.         | Reducing loss to follow-up with tele-audiology diagnostic evaluations.                                                                                      | 2016 | USA          | 22     | Auditory Brainstem Response testing                                                            | synchronous  | telepresenter                                                                         | Prepare infant's skin, apply and connect ABR electrodes, place probes in the infant's ears, position otoscope, assist the parent with attaining a sleep state for the infant under the guidance of the audiologist.                                                                                                                                                                       | No details          | No details            | No details                                                                                                                                                                                                                                        |
| 52 | Mahomed-Asmail et al.  | Clinical validity of hearScreen™ smartphone hearing.                                                                                                        | 2016 | South Africa | 1,070  | pure tone audiometry screening                                                                 | synchronous  | second year audiology student                                                         | Conduct smartphone hearing screening, conduct conventional hearing screening, instruct child to raise their hand when they hear tone, wait for ambient noise to pass when too loud to conduct screening.                                                                                                                                                                                  | Audiologist         | No details            | Use of smartphone hearing screening and how to conduct conventional screening audiometry.                                                                                                                                                         |
| 53 | Van Tonder et al. *    | Automated smartphone threshold audiometry: Validity and time efficiency.                                                                                    | 2017 | South Africa | 95     | pure tone audiometry screening                                                                 | asynchronous | researcher                                                                            | Facilitate automated hearing screening protocol, upload results to server.                                                                                                                                                                                                                                                                                                                | No details          | No details            | No details                                                                                                                                                                                                                                        |
| 54 | Lundberg et al. *      | Diagnostic accuracy of a general practitioner with video-otoscopy collected by a health care facilitator compared to traditional otoscopy.                  | 2017 | South Africa | 140    | video otoscopy                                                                                 | synchronous  | health care facilitator                                                               | Conduct video otoscopy recordings.                                                                                                                                                                                                                                                                                                                                                        | Otologist           | Two days              | How to conduct video otoscopy.                                                                                                                                                                                                                    |
| 55 | Muñoz et al.           | Paediatric hearing aid management: A demonstration project for using virtual visits to enhance parent support.                                              | 2017 | USA          | 4      | hearing aid fitting services                                                                   | synchronous  | audiology graduate student/clinician                                                  | Set-up videoconferencing connection, and explain testing procedures to clients.                                                                                                                                                                                                                                                                                                           | No details          | No details            | No details                                                                                                                                                                                                                                        |
| 56 | Moshtaghi et al.       | Smartphone-enabled otoscopy in neurotology/otology.                                                                                                         | 2017 | USA          | 57     | video otoscopy                                                                                 | asynchronous | research assistant or medical student                                                 | Conduct video otoscopy.                                                                                                                                                                                                                                                                                                                                                                   | No details          | No details            | No details                                                                                                                                                                                                                                        |
| 57 | Monica et al.          | School entry level tele-hearing screening in a town in South India – Lessons learnt.                                                                        | 2017 | India        | 31     | pure tone audiometry screening                                                                 | synchronous  | teacher                                                                               | Conduct video otoscopy, conduct hearing screening, perform Ling Six sound test.                                                                                                                                                                                                                                                                                                           | Audiologist         | Two days              | How to access the internet, establish videoconferencing, connect hardware to the computer, place headphones on a child's head, insert an OAE probe into the child's ear, and sanitize equipment.                                                  |
| 58 | Gupta et al.           | Community triage of otology patients using a store-and-forward telemedicine device: A feasibility study.                                                    | 2017 | India        | 3,000  | video otoscopy                                                                                 | asynchronous | health workers who had basic secondary school degrees and an aptitude for social work | Capture digital image of tympanic membrane and ear canal, store it in memory of smart phone, upload it to website, and collect client case history.                                                                                                                                                                                                                                       | ENT department      | Three months          | Anatomy and physiology of the ear, ear diseases, examining the ear, symptoms of ear diseases, community ear care, patient handling, eliciting clinical history. Training included direct observation in ENT clinic.                               |
| 59 | Brennan-Jones et al. * | Diagnosis of hearing loss using automated audiometry in an asynchronous telehealth model: A pilot accuracy study.                                           | 2017 | Australia    | 42     | pure tone audiometry                                                                           | asynchronous | researcher                                                                            | Conduct automated audiometry, instruct clients on testing procedure, place transducers on client, monitor progress of test.                                                                                                                                                                                                                                                               | No details          | No details            | No details                                                                                                                                                                                                                                        |
| 60 | Yousuf Hussein et al.  | Community-based hearing screening for young children using an mHealth service-delivery model.                                                               | 2018 | South Africa | 6424   | pure tone audiometry screening                                                                 | synchronous  | community health worker                                                               | Identify clients, collect client information, conduct audiometric screening using automated protocol.                                                                                                                                                                                                                                                                                     | No details          | No details            | Ear and hearing health care and its importance, hands-on practice with hearing screening smartphone application.                                                                                                                                  |
| 61 | Venail et al.          | Evaluation of otoscopy simulation as a training tool for real-time remote otoscopy.                                                                         | 2018 | France       | 6      | video otoscopy                                                                                 | synchronous  | undergraduate 3rd year students with no previous experience of eardrum examination    | Conduct video otoscopy, identify landmark features on the tympanic membrane.                                                                                                                                                                                                                                                                                                              | No details          | Two hours             | Instruction on the external and middle ear anatomy, and practical training with an otoscopy simulator. Simulator training covered hand positioning, positioning and manipulation of the otoscope, and proper software use.                        |
| 62 | Ramkumar et al. *      | Validation of DPOAE screening conducted by village health workers in a rural community with real-time click evoked tele-auditory brainstem response.        | 2018 | India        | 119    | Auditory Brainstem Response and Otoacoustic Emissions screening                                | synchronous  | village health worker                                                                 | Position child for testing, ensure child is asleep, place ABR electrodes on child.                                                                                                                                                                                                                                                                                                        | No details          | Five days             | How to assist with conducting Distortion Product Otoacoustic Emissions and how to read and respond to screening instrument messages. Facilitators' competence was assessed following the training, and regular reviews were conducted.            |

|    |                         |                                                                                                                                                                             |      |              |      |                                                                 |                              |                                                                                 |                                                                                                                                                                         |                         |                 |                                                                                                                                                                                                                      |
|----|-------------------------|-----------------------------------------------------------------------------------------------------------------------------------------------------------------------------|------|--------------|------|-----------------------------------------------------------------|------------------------------|---------------------------------------------------------------------------------|-------------------------------------------------------------------------------------------------------------------------------------------------------------------------|-------------------------|-----------------|----------------------------------------------------------------------------------------------------------------------------------------------------------------------------------------------------------------------|
| 63 | Ramkumar et al.         | Identification and management of middle ear disorders in a rural cleft care program: A telemedicine approach.                                                               | 2018 | India        | 160  | video otoscopy                                                  | synchronous and asynchronous | community workers                                                               | Set up equipment, prepare participant for test, place probe in participant's ear, and conduct manual aspects of video otoscopy, tympanometry, and pure tone audiometry. | No details              | Two days        | Orientation to the ear and middle ear disorders, how to input demographic and patient history data to mobile application, and how to operate the video otoscopy device. Training included a hands-on module.         |
| 64 | Ramkumar et al.         | Cost and outcome of a community-based paediatric hearing screening programme in rural India with application of tele-audiology for follow-up diagnostic hearing assessment. | 2018 | India        | 1335 | Auditory Brainstem Response and Otoacoustic Emissions screening | synchronous                  | village health worker                                                           | Collect client case history, conduct DPOAE screening, prepare child for ABR assessment (electrode placement, ensure child is asleep).                                   | No details              | No details      | How to conduct hearing screening.                                                                                                                                                                                    |
| 65 | Masalski et al.*        | Hearing tests based on biologically calibrated mobile devices: Comparison with pure-tone audiometry.                                                                        | 2018 | Poland       | 70   | pure tone audiometry screening                                  | synchronous                  | audiologist                                                                     | Assist client before, during, and after test by answering questions and preventing mistakes during testing.                                                             | No details              | No details      | No details                                                                                                                                                                                                           |
| 66 | Hughes et al.           | Measuring sound-processor thresholds for pediatric cochlear implant recipients using Visual Reinforcement Audiometry via telepractice.                                      | 2018 | USA          | 17   | cochlear implant programming                                    | synchronous                  | audiologist or speech pathologist                                               | Connect cochlear implant processor to programming cable, use toys to center child's attention during testing.                                                           | Audiologist             | No details      | Watched recorded clinical sessions and received direct instruction on procedures.                                                                                                                                    |
| 67 | Govender & Mars         | Assessing the efficacy of asynchronous telehealth-based hearing screening and diagnostic services using automated audiometry in a rural South African school.               | 2018 | South Africa | 73   | pure tone audiometry screening                                  | asynchronous                 | community member                                                                | Collect video otoscopy recordings, conduct audiometric screening using an automated protocol, set up equipment, instruct client on testing procedure.                   | Researcher              | Two days        | Overview of the hearing screening protocol and orientation to equipment, patient management, and troubleshooting, and included a practical component where the facilitator conducted a screenings under observation. |
| 68 | Brennan-Jones et al.*   | Asynchronous interpretation of manual and automated audiometry: Agreement and reliability.                                                                                  | 2018 | Australia    | 42   | pure tone audiometry screening                                  | asynchronous                 | audiologist or researcher                                                       | Conduct automated audiometry.                                                                                                                                           | No details              | No details      | No details                                                                                                                                                                                                           |
| 69 | Yanov et al.            | Successful application and timing of a remote network for intraoperative objective measurements during cochlear implantation surgery.                                       | 2018 | Russia       | 50   | intraoperative monitoring                                       | synchronous                  | staff member                                                                    | Set up equipment, handle equipment in the operating theatre.                                                                                                            | No details              | No details      | Set up, use, and support the physical setup of equipment while in the operating room.                                                                                                                                |
| 70 | Jayawardena et al.      | Expanding the capacity of otolaryngologists in Kenya through mobile technology.                                                                                             | 2018 | Kenya        | 87   | pure tone audiometry screening                                  | asynchronous                 | local nurse, community health worker, & non-governmental organization volunteer | Assist with aspects of iPhone-based otoscopy and mobile-based hearing screening, provide instruction as needed to patients during automated hearing testing.            | No details              | Two hours       | Use automated screening, generate audiograms, conduct endoscopy.                                                                                                                                                     |
| 71 | Seimm et al.            | Developing a synchronous otolaryngology telemedicine concordance clinic: Prospective study to assess fidelity and diagnostic.                                               | 2018 | USA          | 21   | video otoscopy                                                  | synchronous                  | experienced otolaryngologist                                                    | Perform otoscopy, discuss findings with client.                                                                                                                         | No details              | No details      | No details                                                                                                                                                                                                           |
| 72 | Yulzari et al.          | Mobile technology-based real-time teleotolaryngology care facilitated by a nonotolaryngologist physician in an adult population.                                            | 2018 | Israel       | 48   | video otoscopy                                                  | synchronous                  | final year medical student                                                      | Conduct smartphone otoscopy.                                                                                                                                            | Otolaryngologist        | No details      | Use diagnostic equipment.                                                                                                                                                                                            |
| 73 | Yancey et al.           | Pediatric hearing screening in low-resource settings: Incorporation of video-otoscopy and an electronic medical record.                                                     | 2019 | Kenya        | 155  | pure tone audiometry screening and video otoscopy               | asynchronous                 | community health worker                                                         | Conduct video otoscopy and hearing screening and upload results to mobile device.                                                                                       | Otolaryngologist        | Two hours       | Use automated audiometry and a mobile EMR application.                                                                                                                                                               |
| 74 | Erkkola-Anttinen et al. | Smartphone otoscopy performed by parents.                                                                                                                                   | 2019 | Finland      | 41   | video otoscopy                                                  | asynchronous                 | parent                                                                          | Conduct smartphone otoscopy, send videos to study physician, take child to a physician when necessary.                                                                  | Physician               | One hour        | Smartphone otoscopy, which the facilitator practiced first on other facilitators, and then the child (client).                                                                                                       |
| 75 | Ameyaw et al.           | Interregional newborn hearing screening via telehealth in Ghana.                                                                                                            | 2019 | Ghana        | 50   | Otoacoustic Emissions                                           | synchronous                  | audiologist                                                                     | Conduct DPOAE screenings, operate equipment.                                                                                                                            | No details              | No details      | No details                                                                                                                                                                                                           |
| 76 | Demant et al.           | Smartphone otoscopy by on-specialist health workers in rural Greenland: A cross-sectional study.                                                                            | 2019 | France       | 124  | video otoscopy                                                  | asynchronous                 | nurses, medical students, physicians                                            | Conduct video otoscopy.                                                                                                                                                 | No details              | No details      | No details                                                                                                                                                                                                           |
| 77 | Hatton et al.           | Telehealth-enabled auditory brainstem response testing for infants living in rural communities: The British Columbia Early Hearing Program experience.                      | 2019 | Greenland    | 102  | Auditory Brainstem Response screening                           | synchronous                  | audiometric technician                                                          | Greet client, prepare client for ABR, including electrode and transducer placement.                                                                                     | Audiologist             | Three-four days | How to conduct ABR.                                                                                                                                                                                                  |
| 78 | Shinn et al.            | Community health workers obtain similar results using cell-phone based hearing screening tools compared to otolaryngologists in low resourced settings.                     | 2019 | Kenya        | 104  | pure tone audiometry screening, video otoscopy                  | asynchronous                 | Community Health Worker or otolaryngologist                                     | Perform audiometric screening and video otoscopy.                                                                                                                       | Otolaryngolgy residents | Two sessions    | Hands-on mobile-based audiometry, screening audiometry, otoscopy.                                                                                                                                                    |

|    |                 |                                                                                                                                                                           |      |              |      |                                                             |                              |                                        |                                                                                                                  |             |                                |                                                                                                                                                                                                                                     |
|----|-----------------|---------------------------------------------------------------------------------------------------------------------------------------------------------------------------|------|--------------|------|-------------------------------------------------------------|------------------------------|----------------------------------------|------------------------------------------------------------------------------------------------------------------|-------------|--------------------------------|-------------------------------------------------------------------------------------------------------------------------------------------------------------------------------------------------------------------------------------|
| 79 | Shah et al.     | Smartphone telemedical emergency department consults for screening of nonacute dizziness.                                                                                 | 2019 | USA          | 30   | Dix Hallpike                                                | asynchronous                 | resident physician                     | Perform Dix Hallpike, use smartphone to record patient's eye movements.                                          | No details  | No details                     | No details                                                                                                                                                                                                                          |
| 80 | Ramkumar et al. | Implementation and evaluation of a rural community-based pediatric hearing screening program integrating in-person and tele-diagnostic auditory brainstem response (ABR). | 2019 | India        | 1480 | hearing screening and Auditory Brainstem Response screening | synchronous                  | village health worker                  | Conduct DPOAE screening, assist in tele-ABR (prepping skin, placing electrodes and transducers, position child). | No details  | Five days (six hours each day) | Powerpoints, handouts, videos, and hands-on: need for screening, conducive environments for screening, prepping skin for ABR, placing electrodes and transducer.                                                                    |
| 81 | Eksteen et al.  | Hearing and vision screening for preschool children using mobile technology, South Africa.                                                                                | 2019 | South Africa | 8023 | pure tone audiometry screening                              | synchronous                  | community health worker                | Conduct hearing screening using mobile screening device.                                                         | Audiologist | Five days                      | How to conduct hearing screening, use of equipment, assessment of responses.                                                                                                                                                        |
| 82 | Ravi et al.     | Tele-audiological surveillance of middle ear status among individuals with cleft lip and/or palate in rural South India.                                                  | 2019 | India        | 109  | video otoscopy, pure tone audiometry, tympanometry          | asynchronous and synchronous | community-based rehabilitation workers | Conduct video otoscopy, set up videoconferencing session, place transducers on client.                           | Audiologist | No details                     | How to operate laptop, establish internet connectivity using a mobile hotspot, connect a microphone and web camera to establish videoconferencing, connect audiological testing equipment to laptops, place transducers on patient. |
