# Supplementary material
Source: publisher figshare collection journal article supplement (https://asha.figshare.com/articles/dataset/_/12475796)
Supplement: Supplementary file 2 [file 1]

## Supplemental Material S2.

Audiology-related sub-specialty duties performed by patient-site facilitators with citations.

| Subspecialty                                                 | Count | Study                                                                                                                                                                                                                                                                                                                                                                                                                                                                                                                                                                                                                                                                                                                                                                                                                                         |
|--------------------------------------------------------------|-------|-----------------------------------------------------------------------------------------------------------------------------------------------------------------------------------------------------------------------------------------------------------------------------------------------------------------------------------------------------------------------------------------------------------------------------------------------------------------------------------------------------------------------------------------------------------------------------------------------------------------------------------------------------------------------------------------------------------------------------------------------------------------------------------------------------------------------------------------------|
| Conduct or assist with otoscopy/video otoscopy               | 37    | Stern et al., 1998; Sclafani et al., 1998; Patricoski et al., 2003; Smith et al., 2005, 2006; Krumm et al., 2007; Lundberg et al., 2008; Lancaster et al., 2008; Kokesh et al., 2008; Smith et al., 2008; Ferrari & Bernandez-Braga, 2009; Kokesh et al., 2009; Elliot et al., 2010; Smith et al., 2012; Campos & Ferrari, 2012; Biagio et al., 2013; Lundberg et al., 2014; Biagio et al., 2014; Smith et al., 2015; Botasso et al., 2015; Pross et al., 2016; Novak et al., 2016; Lundberg et al., 2017; Moshtaghi et al., 2017; Monica et al., 2017; Gupta et al., 2017; Venali et al., 2018; Ramkumar, Rajendran, et al., 2018; Govender & Mars, 2018; Jayawardena et al., 2018; Seimm et al., 2018; Yulzari et al., 2018; Yancey et al., 2019; Erkkola-Anttinen et al., 2019; Demant et al., 2019; Shinn et al., 2019; Ravi et al., 2019 |
| Perform or assist with hearing assessments/screening         | 27    | Givens et al., 2003; Givens & Elangovan, 2003; Elangovan, 2005; Krumm et al., 2007; Kokesh et al., 2009; Swanepoel et al., 2010, 2014; Crowell et al., 2011; Ciccica et al., 2011; Smith et al., 2012; Smith et al., 2015; Botasso et al., 2015; Yousuf Hussein et al., 2016; Sandstrom et al., 2016; Pross et al., 2016; Mahomed-Asmail et al., 2016; Van Tonder et al., 2017; Monica et al., 2017; Brennan-Jones et al., 2017, 2018; Yousuf Hussein et al., 2018; Ramkumar, Rajendran, et al., 2018; Govender & Mars, 2018; Jayawardena et al., 2018; Yancey et al., 2019; Shinn et al., 2019; Eksteen et al., 2019                                                                                                                                                                                                                         |
| Place transducers                                            | 15    | Towers et al., 2005; Elangovan, 2005; Krumm et al., 2007; Lancaster et al., 2008; Krumm et al., 2008; Swanepoel et al., 2010; Dharmar et al., 2016; Ramkumar et al., 2013, 2019; Ramkumar, Rajendran, et al., 2018; Sandstrom et al., 2016; Pross et al., 2016; Brennan-Jones et al., 2017; Hatton et al., 2019; Ravi et al., 2019                                                                                                                                                                                                                                                                                                                                                                                                                                                                                                            |
| Instruct patient/parents on testing procedures               | 13    | Elangovan, 2005; Krumm et al., 2007; Crowell et al., 2011; Swanepoel et al., 2010; Eikelboom et al., 2014; Yousuf Hussein et al., 2016; Sandstrom et al., 2016; Mahomed-Asmail et al., 2016; Munoz et al., 2017; Brennan-Jones et al., 2017; Masalski et al., 2018; Govender & Mars, 2018; Jayawardena et al., 2018                                                                                                                                                                                                                                                                                                                                                                                                                                                                                                                           |
| Conduct or assist with immittance testing                    | 8     | Lundberg et al., 2008; Kokesh et al., 2009; Elliot et al., 2010; Smith et al., 2012; Bottasso et al., 2015; Ciccica et al., 2011; Pross et al., 2016; Ramkumar et al., 2018                                                                                                                                                                                                                                                                                                                                                                                                                                                                                                                                                                                                                                                                   |
| Conduct or assist with Otoacoustic Emissions                 | 7     | Ramkumar et al., 2018, 2019; Ameyaw et al., 2019; Elangovan, 2005; Kokesh et al., 2009; Ciccica et al., 2011; Pross et al., 2016                                                                                                                                                                                                                                                                                                                                                                                                                                                                                                                                                                                                                                                                                                              |
| Place Auditory Brainstem Response electrodes                 | 7     | Towers et al., 2005; Krumm et al., 2008; Ramkumar et al., 2013, 2019; Ramkumar, Vanaja, et al., 2018; Dharmar et al., 2016; Hatton et al., 2019                                                                                                                                                                                                                                                                                                                                                                                                                                                                                                                                                                                                                                                                                               |
| Place Real Ear Measurement probe in client's ears            | 6     | Ramkumar et al., 2018; Pearce et al., 2009; Ferrari & Bernandez-Braga, 2009; Campos & Ferrari, 2012; Reginato & Ferrari, 2014; Novak et al., 2016                                                                                                                                                                                                                                                                                                                                                                                                                                                                                                                                                                                                                                                                                             |
| Prepare client's skin for electrodes                         | 5     | Towers et al., 2005; Ramkumar et al., 2013, 2019; Dharmar et al., 2016, 2019                                                                                                                                                                                                                                                                                                                                                                                                                                                                                                                                                                                                                                                                                                                                                                  |
| Administer questionnaire                                     | 4     | Smith et al., 2012; Wasowski et al., 2012; Pentead et al., 2014; Eikelboom et al., 2014                                                                                                                                                                                                                                                                                                                                                                                                                                                                                                                                                                                                                                                                                                                                                       |
| Connect hearing aids to programming cables/computer          | 4     | Pearce et al., 2009; Campos & Ferrari, 2012; Reginato & Ferrari, 2014; Pentead et al., 2014                                                                                                                                                                                                                                                                                                                                                                                                                                                                                                                                                                                                                                                                                                                                                   |
| Position client in testing environment                       | 4     | Campos & Ferrari, 2012; Reginato & Ferrari, 2014; Ramkumar, Rajendran, et al., 2018; Ramkumar, Vanaja, et al., 2018                                                                                                                                                                                                                                                                                                                                                                                                                                                                                                                                                                                                                                                                                                                           |
| Perform safety simulation stops for cochlear implant testing | 3     | Ramos et al., 2009; Wasowski et al., 2010; Wesarg et al., 2010                                                                                                                                                                                                                                                                                                                                                                                                                                                                                                                                                                                                                                                                                                                                                                                |

|                                                                |   |                                                                         |
|----------------------------------------------------------------|---|-------------------------------------------------------------------------|
| Connect/disconnect cochlear implant speech processor           | 3 | Wesarg et al., 2010; Wasowski et al., 2012; Hughes et al., 2018         |
| Insert and remove hearing aid and ear mold                     | 3 | Campos & Ferrari, 2012; Reginato & Ferrari, 2014; Penteado et al., 2014 |
| Administer speech testing materials                            | 2 | Ribera, 2005; Pross et al., 2016                                        |
| Judge subject's response; monitor testing progress             | 2 | Ribera, 2005; Brennan-Jones et al., 2017                                |
| Produce sounds for cochlear implant testing                    | 2 | Ramos et al., 2009                                                      |
| Administer Ling Six sound test                                 | 2 | Eikelboom et al., 2014; Monica et al., 2017                             |
| Place cochlear implant equipment in sterile bag                | 1 | Shapiro et al., 2008                                                    |
| Conduct hearing aid fitting under supervision                  | 1 | Penteado et al., 2012                                                   |
| Assist with calibration of speech materials                    | 1 | Hughes et al., 2012                                                     |
| Calibrate Real Ear Measurement probe tubes                     | 1 | Reginato & Ferrari, 2014                                                |
| Check hearing aid ear molds for wax                            | 1 | Penteado et al., 2014                                                   |
| Help determine hearing needs of client                         | 1 | Novak et al., 2016                                                      |
| Measure pinna to prepare to hearing aid tube                   | 1 | Novak et al., 2016                                                      |
| Assist client in selection of hearing aid color                | 1 | Novak et al., 2016                                                      |
| Conduct listening check of hearing aids                        | 1 | Novak et al., 2016                                                      |
| Help orient the client on care and maintenance of hearing aids | 1 | Novak et al., 2016                                                      |
| Discuss test findings with client                              | 1 | Seimm et al., 2018                                                      |
| Perform Dix Hallpike and record eye movements                  | 1 | Shah et al., 2019                                                       |
| Use toys to center child's attention during testing            | 1 | Hughes et al., 2018                                                     |
