# Supplementary material
Source: publisher figshare collection journal article supplement (https://asha.figshare.com/articles/dataset/_/12475796)
Supplement: Supplementary file 3 [file 1]

## Supplemental Material S2.

General telehealth duties performed by patient-site facilitators with citations.

| General Patient-Site Facilitator Duty                                           | Count | Study                                                                                                                                                                                                                                                                                                                                                                      |
|---------------------------------------------------------------------------------|-------|----------------------------------------------------------------------------------------------------------------------------------------------------------------------------------------------------------------------------------------------------------------------------------------------------------------------------------------------------------------------------|
| Obtain case history/interview client                                            | 17    | Stern et al., 1998; Elangovan, 2005; Smith et al., 2006; Kokesh et al., 2008; Lundberg et al., 2008; Kokesh et al., 2008; Kokesh et al., 2009; Smith et al., 2012; Wasowski et al., 2012; Biagio et al., 2013; Biagio et al., 2014; Smith et al., 2015; Sandstrom et al., 2016; Novak et al., 2016; Gupta et al., 2017; Ramkumar et al., 2018; Yousuf Hussein et al., 2018 |
| Operate equipment                                                               | 13    | Crump & Driscoll, 1996; Shapiro et al., 2008; Ramos et al., 2009; Pearce et al., 2009; Wesarg et al., 2010; Crowell et al., 2011; Penteado et al., 2012; Hughes et al., 2012; Ramkumar, Rajendran, et al., 2018; Govender & Mars, 2018; Yanov et al., 2018; Ameyaw et al., 2019; Jayawardena et al., 2018                                                                  |
| Communicate/help client communicate with remote site                            | 13    | Crump & Driscoll, 1996; Ribera, 2005; Elangovan, 2005; Shapiro et al., 2008; Lundberg et al., 2008; Ramos et al., 2009; Swanepoel et al., 2010; Wasowski et al., 2010; Wesarg et al., 2010; Wasowski et al., 2012; Penteado et al., 2012; Reginato & Ferrari, 2014; Masalski et al., 2018                                                                                  |
| Upload/store data on server                                                     | 6     | Patricoski et al., 2003; Lundberg et al., 2008; Lundberg et al., 2014; Van Tonder et al., 2017; Gupta et al., 2017; Yancey et al., 2019                                                                                                                                                                                                                                    |
| Set up/monitor videoconferencing session                                        | 6     | Smith et al., 2005; Lundberg et al., 2008; Swanepoel et al., 2010; Hughes et al., 2012; Munoz et al., 2017; Ravi et al., 2019                                                                                                                                                                                                                                              |
| Send data to remote site                                                        | 5     | Stern et al., 1998; Sclafani et al., 1999; Smith et al., 2005; Ciccia et al., 2011; Erkkola-Anttinen et al., 2019                                                                                                                                                                                                                                                          |
| Assist with holding child during testing or assisting in getting child to sleep | 4     | Ramkumar, Vanaja, et al., 2018; Patricoski et al., 2003; Dharmar et al., 2016; Ramkumar, Selvakumar, et al., 2018                                                                                                                                                                                                                                                          |
| Greet/check out client                                                          | 3     | Hughes et al., 2012; Novak et al., 2016; Hatton et al., 2019                                                                                                                                                                                                                                                                                                               |
| Refer client for further testing                                                | 3     | Yousuf Hussein et al., 2016; Sandstrom et al., 2016; Erkkola-Anttinen et al., 2019                                                                                                                                                                                                                                                                                         |
| Build rapport with client; observe or comfort client and family                 | 3     | Elangovan, 2005; Wesarg et al., 2010; Hayes et al., 2012                                                                                                                                                                                                                                                                                                                   |
| Obtain client consent                                                           | 1     | Crowell et al., 2011                                                                                                                                                                                                                                                                                                                                                       |
| Meet with local staff                                                           | 1     | Hayes et al., 2012                                                                                                                                                                                                                                                                                                                                                         |
| Complete questionnaire to evaluate session                                      | 1     | Ramos et al., 2009                                                                                                                                                                                                                                                                                                                                                         |
